# Supplementary material for: Surface crosslinking effects on contamination resistance of functionalised polymers
Source: Royal Society of Chemistry journal article supplement (doi:10.1039/c2sm27695j), 2012-12-12

## Supporting Information

### Surface Crosslinking Effects on Mechanical Properties of Chemically Modified Polymers for Contamination Resistance

Lachlan A. Shaw<sup>†</sup>, George Yiapanis<sup>‡</sup>, David J. Henry<sup>||</sup>, Shane MacLaughlin<sup>§</sup>, Evan Evans<sup>§</sup>, Irene Yarovsky<sup>†\*</sup>

<sup>†</sup> School of Applied Science, RMIT University, Melbourne, Vic, 3001, Australia, GPO Box 2476

<sup>‡</sup> School of Aerospace, Mechanical and Manufacturing Engineering, RMIT University, Melbourne, Vic, 3001, Australia, GPO Box 2476

<sup>||</sup> School of Chemical and Mathematical Sciences, Murdoch University, WA, 6150, Australia

<sup>§</sup> BlueScope Steel Research, Port Kembla, Australia

\* To whom correspondence should be addressed. Email: Irene.yarovsky@rmit.edu.au.

#### TABLE CAPTIONS

**Table S1: Loading curves for each indentation, including class (Soft, Stiff or Tough). Series abbreviations refer to surface crosslinking type (H – hexamethylene di-isocyanate, I – isophorone di-isocyanate and P – non-surface-crosslinked), functionalization type (F – fluorine, O – hydroxyl) and indented region (A, B, C, D, E).**

**Figure S1: Percentage distributions of Classes for indentation of unmodified crosslinked surfaces.**

**Table 1 Loading curves for each indentation, including class (Soft, Stiff or Tough). Series abbreviations refer to surface crosslinking type (H – hexamethylene di-isocyanate, I – isophorone di-isocyanate and P – non-surface-crosslinked), functionalization type (F – fluorine, O – hydroxyl) and indented region (A, B, C, D, E)**

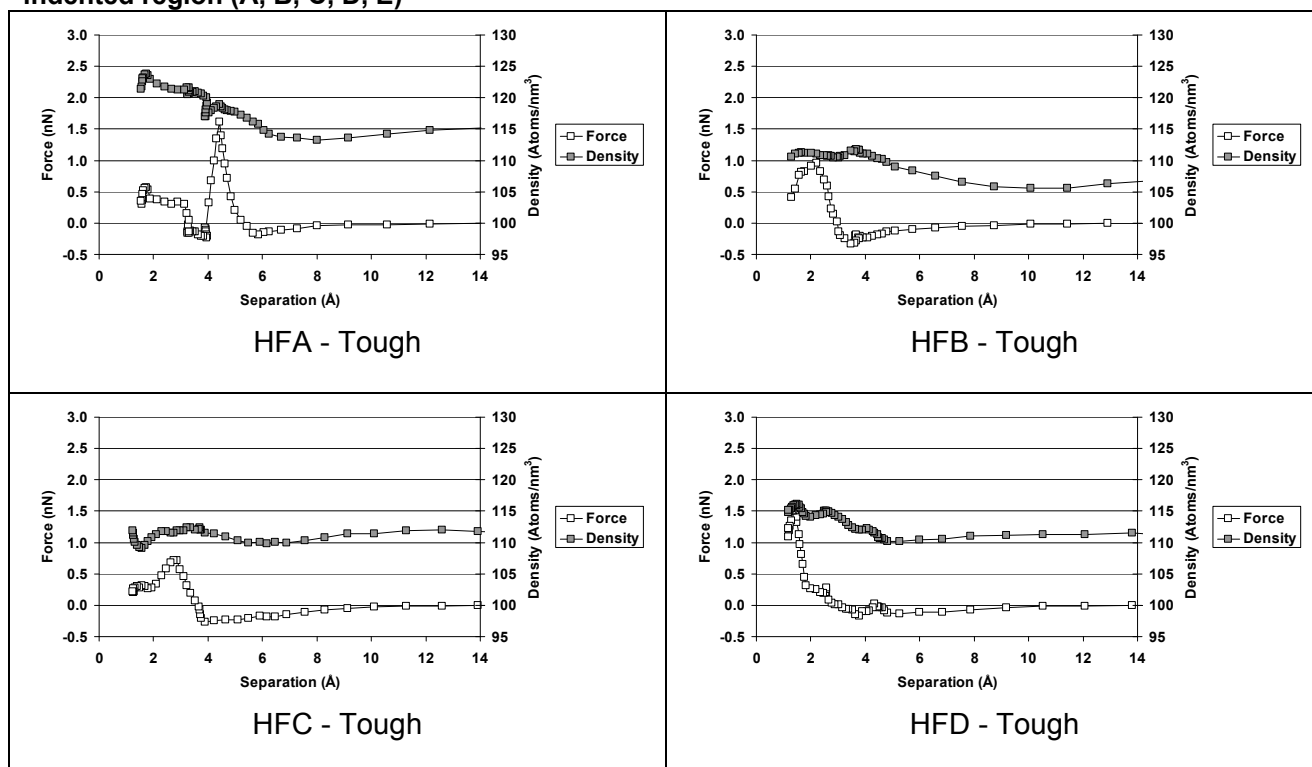

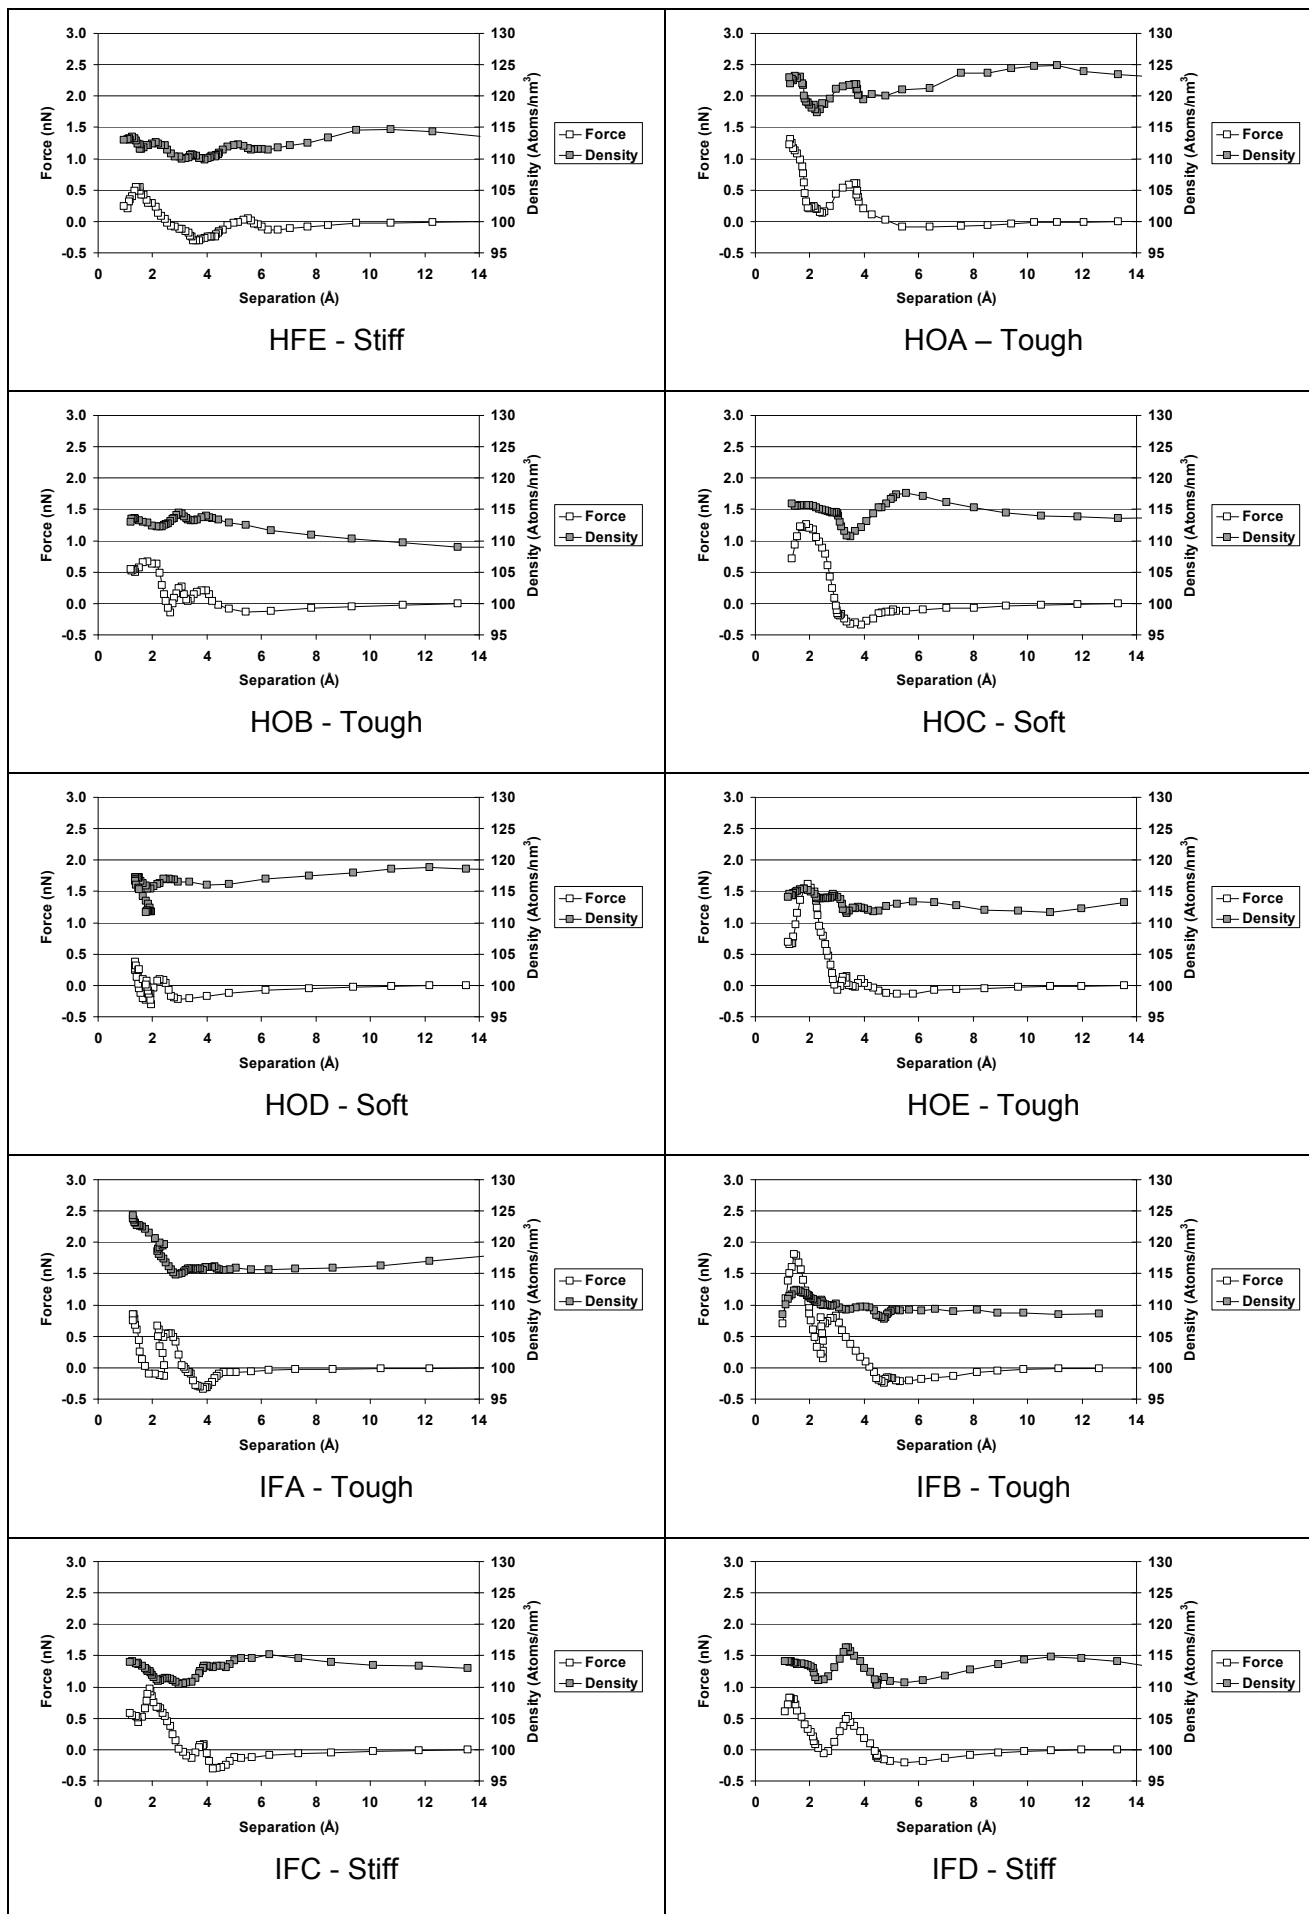

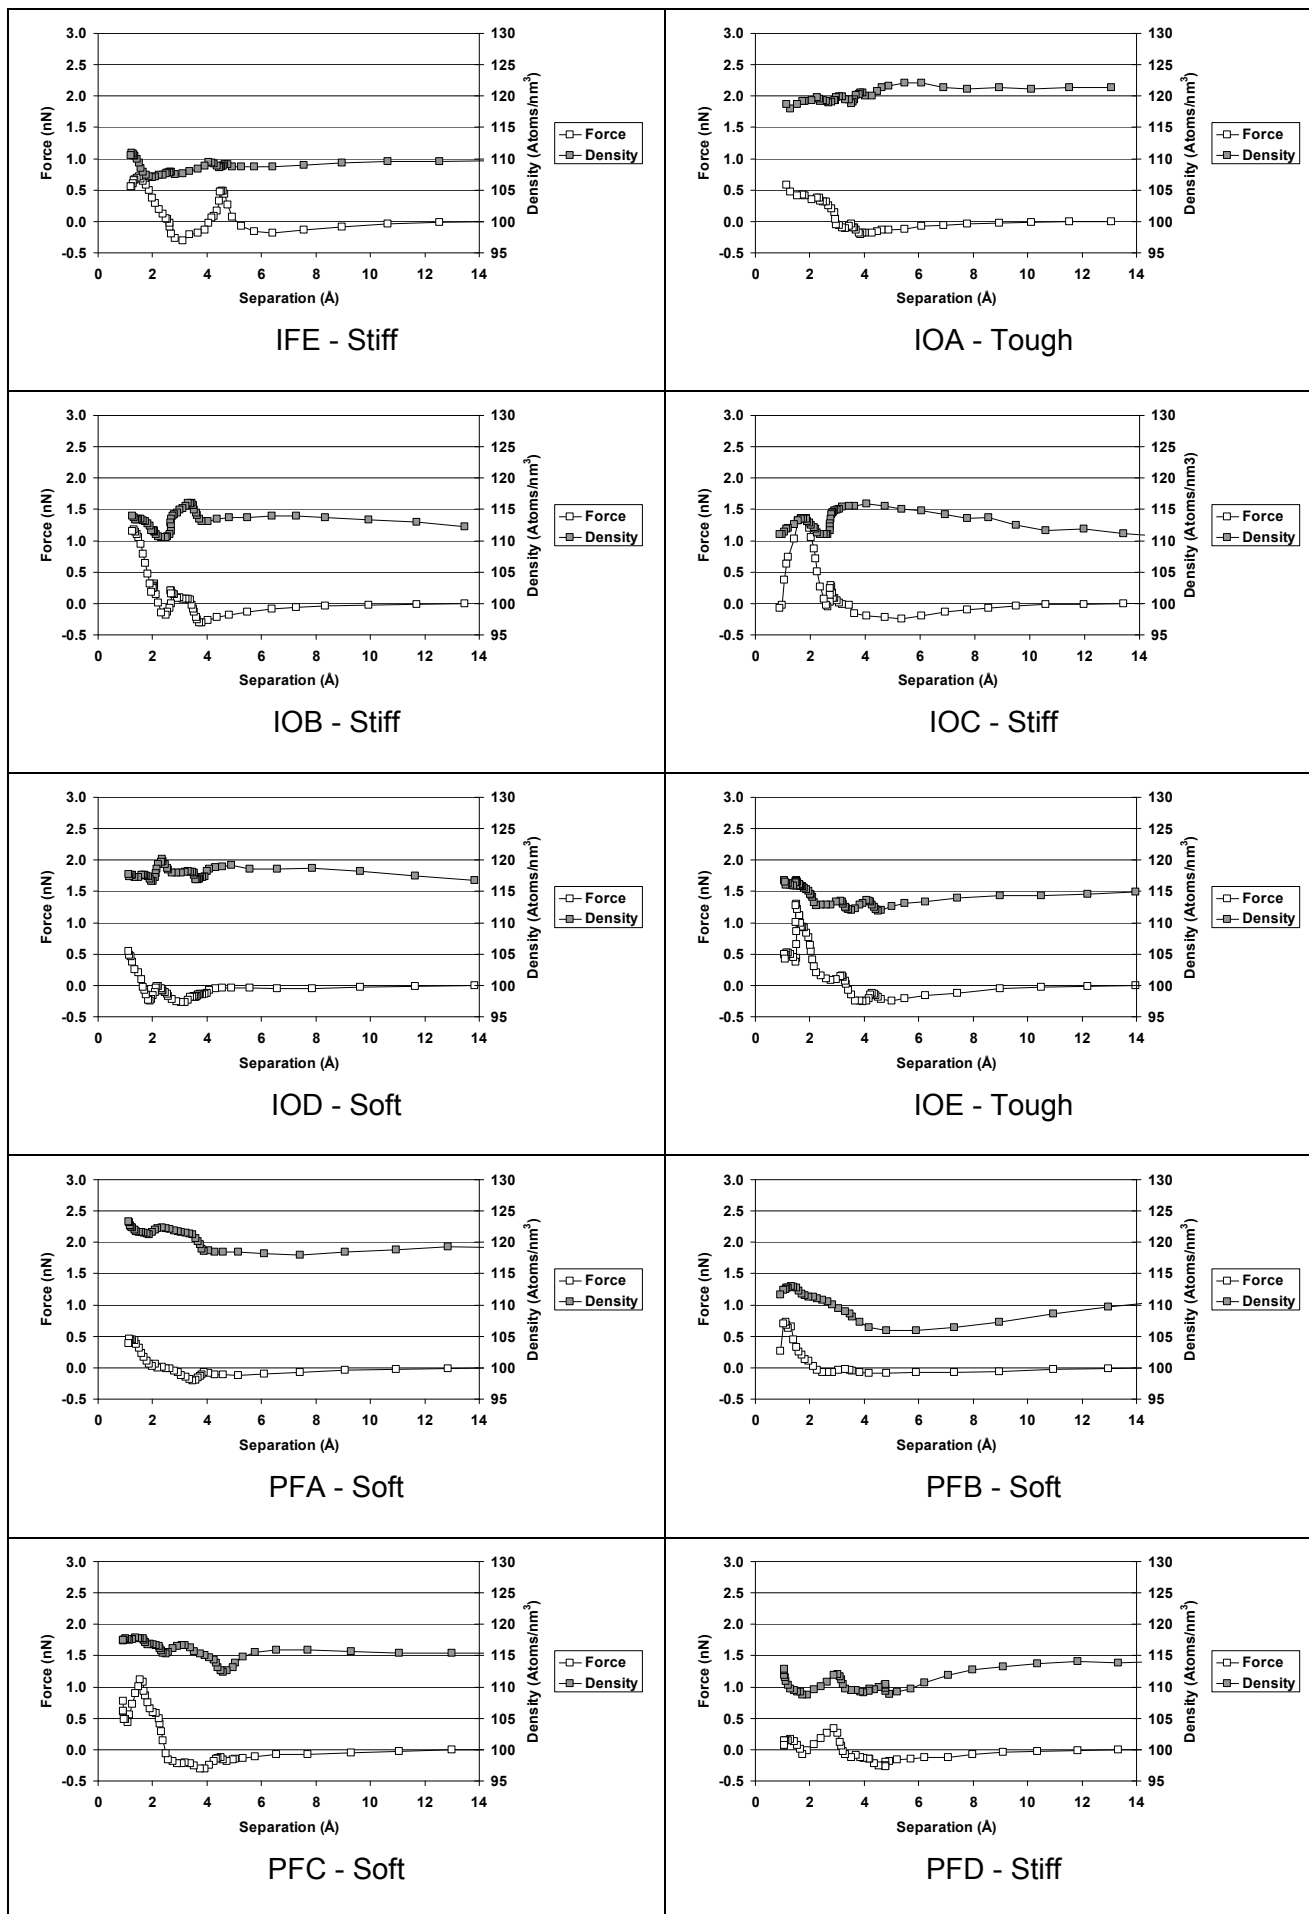

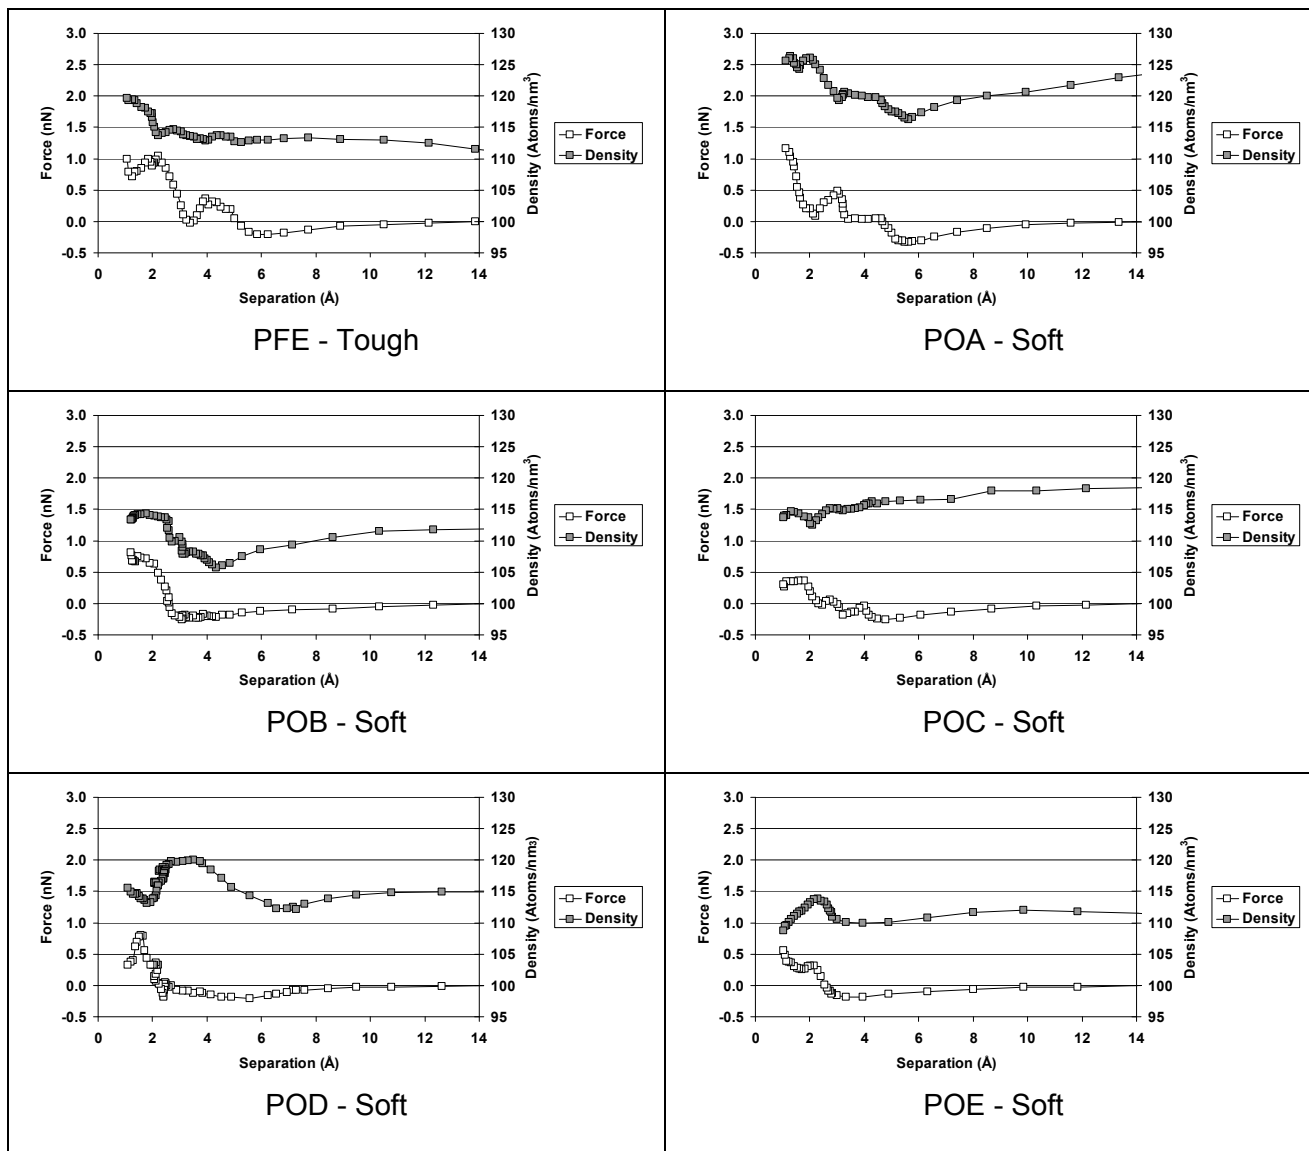

Supplement: c2sm27695j.pdf [file c2sm27695j.pdf]
